# Supplementary material for: Techno-economic analysis of indirect carbonation processes for carbon sequestration using mining waste
Source: Royal Society of Chemistry journal article supplement (doi:10.1039/d4ya00567h), 2025-01-01
Supplement: d4ya00567h1.pdf [file d4ya00567h1.pdf]

## Supplementary Information

| Parameter               | Value                                                                                        |
|-------------------------|----------------------------------------------------------------------------------------------|
| Annual Operational Time | 7,884 hours                                                                                  |
| Labor Cost              | 30% of Maintenance Costs                                                                     |
| Project Lifetime        | 30 years                                                                                     |
| Discount Rate           | 10%                                                                                          |
| CEPCI                   | 790                                                                                          |
| Cost Module             | Total Module Cost                                                                            |
| Engineering Cost        | 12% of Direct Cost of Capital                                                                |
| Construction Cost       | 15% of Equipment Cost                                                                        |
| Contractor's Fee        | 2% of the sum of Direct Cost of Capital,<br>Engineering, Construction, and Contractor's Fees |
| Start Up Cost           | 10% of Fixed Capital Investment Total                                                        |
| Maintenance Cost        | 3% of Total Capital Investment                                                               |
